# Supplementary material
Source: Springer Nature journal article supplement (https://www.springermedizin.de/resource/supplementary/12891_2008_646_MOESM2_ESM.pdf/9506466)

# Person-Item Threshold Distribution

(Grouping Set to Interval Length of 0.20 making 50 Groups)

PERSONS

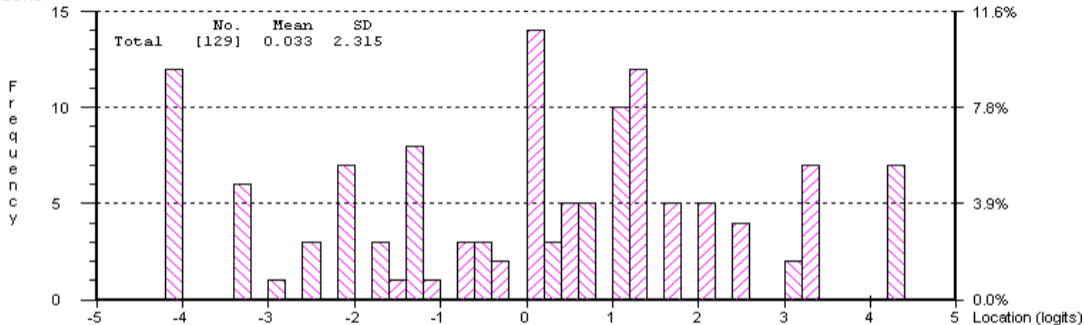

ITEMS

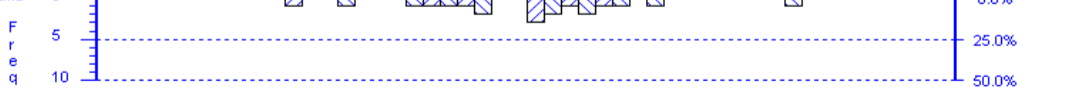

Supplement: MOESM2 [file 9506466]
